# Supplementary material
Source: MDPI journal article supplement (https://www.mdpi.com/2073-4395/13/10/2586)
Supplement: s1 [file s1]

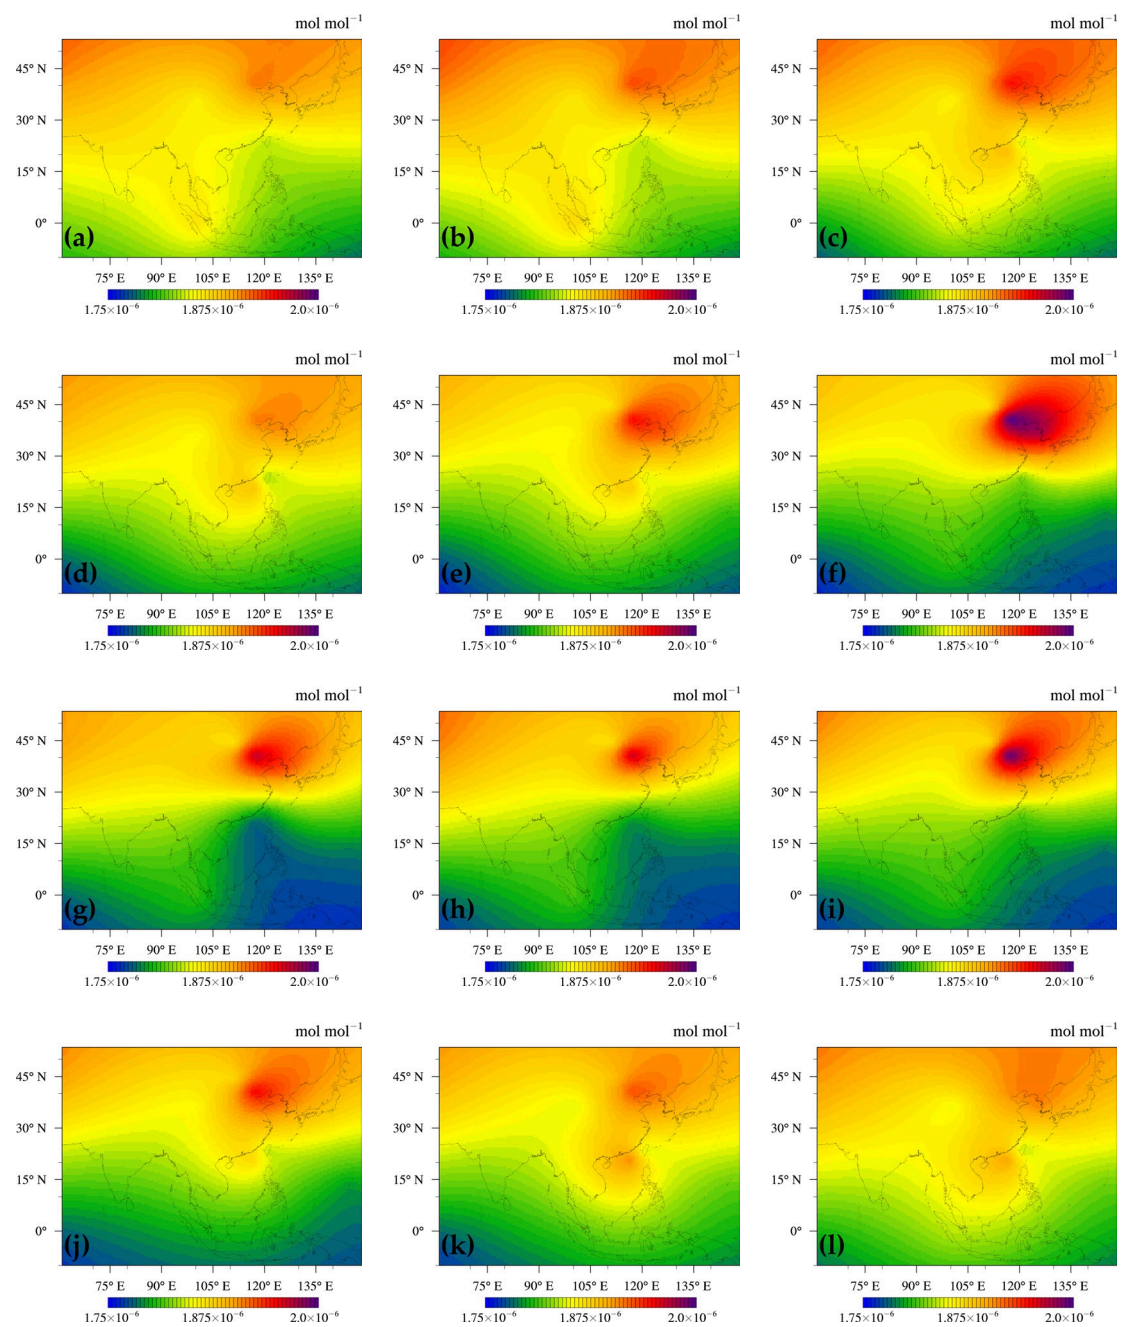

**Figure S1.** Surface  $\text{CH}_4$  mixing ratio for 2010 at (a) January, (b) February, (c) March, (d) April, (e) May, (f) June, (g) July, (h) August, (i) September, (j) October, (k) November, and (l) December.

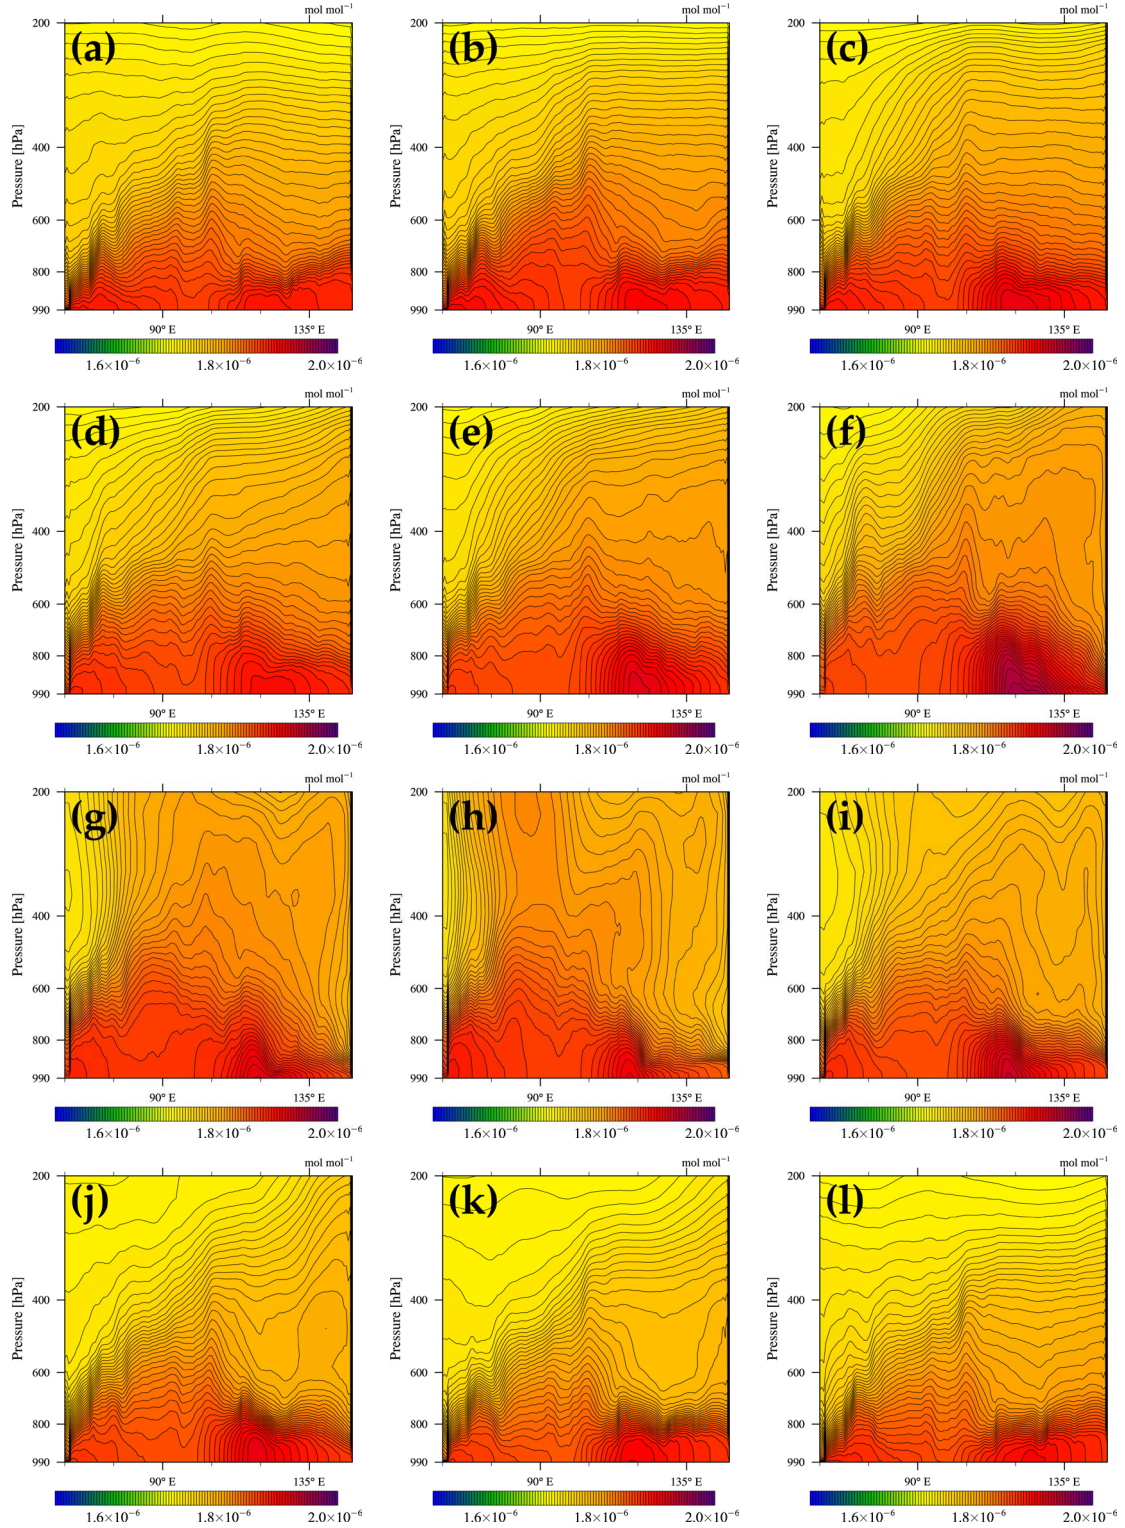

**Figure S2.** Vertical structure of zonal (30–40°N) CH<sub>4</sub> for 2010 at at (a) January, (b) February, (c) March, (d) April, (e) May, (f) June, (g) July, (h) August, (i) September, (j) October, (k) November, and (l) December.
